# Supplementary material
Source: Royal Society of Chemistry journal article supplement (doi:10.1039/d6cy00289g)
Supplement: d6cy00289g1.pdf [file d6cy00289g1.pdf]

1

2

## Supplementary Information

3

4 **Achieving Stable Syngas Production during Photothermal synergistic**

5 **Dry Reforming of Methane over Layered Double Hydroxides-Based**

6 **Catalysts with anti-coking Performance**

7

8 Juntao Li<sup>a</sup>, Tengfei Li<sup>a</sup>, Yuhao Liu<sup>a</sup>, Yang Guo<sup>a,\*</sup>, Lingzhao Kong<sup>b,c</sup>, Pengjie Miao<sup>b,\*</sup>

9 <sup>a</sup> *Key Laboratory of Thermo-Fluid Science and Engineering, Ministry of Education, School of*  
10 *Energy and Power Engineering, Xi'an Jiaotong University, Xi'an, Shaanxi 710049, PR China*

11 <sup>b</sup> *Xinjiang Key Laboratory of New Energy and Energy Storage Technology Xinjiang Institute of*  
12 *Technology, Aksu 843100, PR China*

13 <sup>c</sup> *School of Environmental Science and Technology, Suzhou University of Science and*  
14 *Technology, Suzhou, Jiangsu 215009. PR China*

15

16 Corresponding author: Y. Guo

17 E-mail: guoyang@xjtu.edu.cn ORCID ID: 0000-0001-9830-5942

## 18 Contents

|    |                                                                                                                                              |    |
|----|----------------------------------------------------------------------------------------------------------------------------------------------|----|
| 19 | <b>Supplementary data</b> .....                                                                                                              | 3  |
| 20 | Figure S1. Overall Process Flow Diagram of the System.....                                                                                   | 3  |
| 21 | Figure S2. EDS image of MgAl-LDH. ....                                                                                                       | 4  |
| 22 | Figure S3. EDS image of CuAl-LDH. ....                                                                                                       | 5  |
| 23 | Figure S4. EDS image of Ni/MgAl <sub>2</sub> O <sub>4</sub> . ....                                                                           | 6  |
| 24 | Figure S5. TEM characterization of the Ni/CuAl <sub>2</sub> O <sub>4</sub> catalyst. ....                                                    | 7  |
| 25 | Figure S6. Gas chromatography sample diagram of the reaction product.....                                                                    | 8  |
| 26 | Figure S7. Effect of xenon lamp current on the temperature of different catalysts. ....                                                      | 9  |
| 27 | Table S1. Mass fraction of Ni in the catalyst.....                                                                                           | 10 |
| 28 | Table S2. The specific surface area, pore volume, and average pore diameter of different catalysts. ....                                     | 11 |
| 29 | Table S3. Relative amounts of oxygen vacancies in different catalysts calculated from XPS results. ....                                      | 12 |
| 30 | Table S4. Reaction rates of different catalysts in the TC-DRM and PTSC-DRM reactions. ....                                                   | 13 |
| 31 | Table S5. Selectivity of different catalysts in TC/PTSC-DRM reactions.....                                                                   | 14 |
| 32 | Table S6. Carbon deposition of Ni/MgAl <sub>2</sub> O <sub>4</sub> and Ni/CoAl <sub>2</sub> O <sub>4</sub> after TC and PTSC reactions. .... | 15 |
| 33 |                                                                                                                                              |    |
| 34 |                                                                                                                                              |    |

35 **Supplementary data**

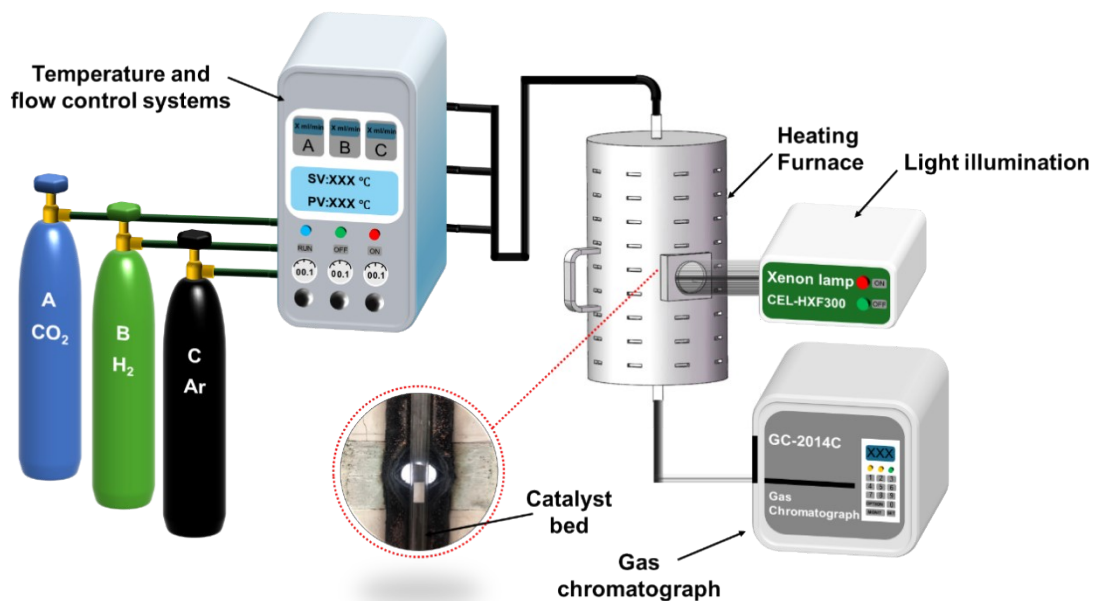

36

37

38

**Figure S1.** Overall Process Flow Diagram of the System.

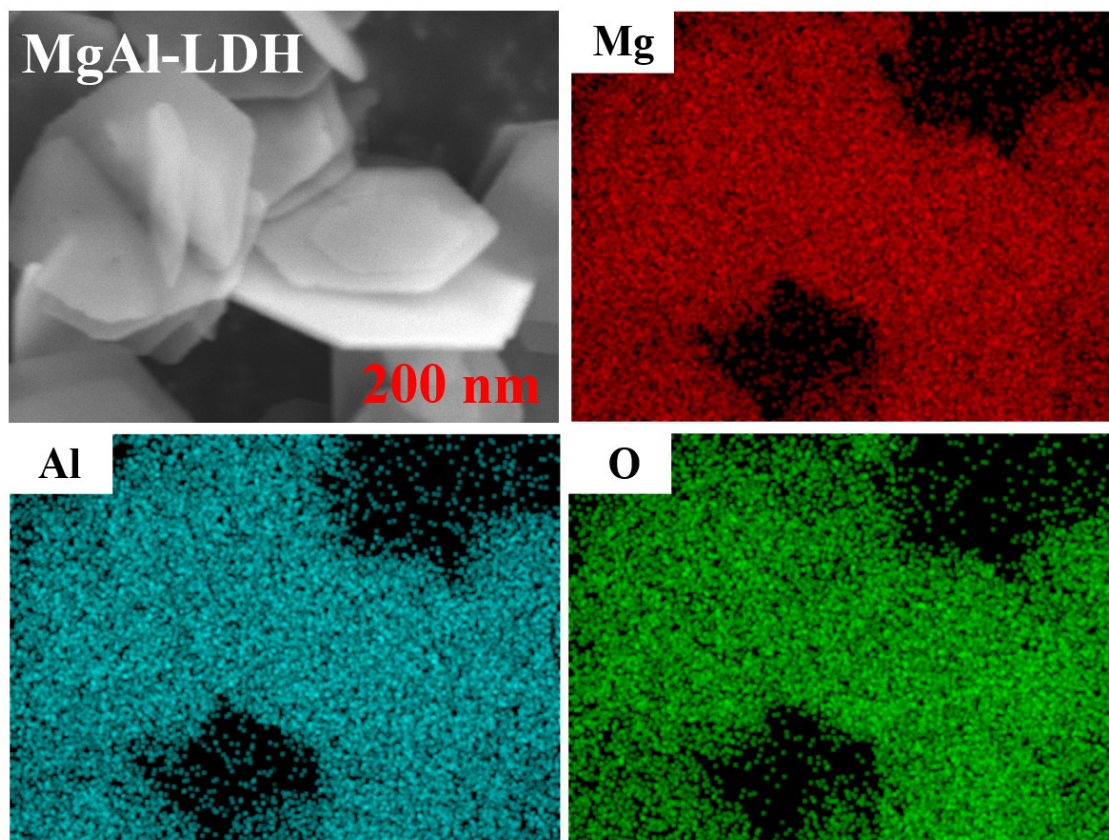

**Figure S2.** EDS image of MgAl-LDH.

39  
40  
41

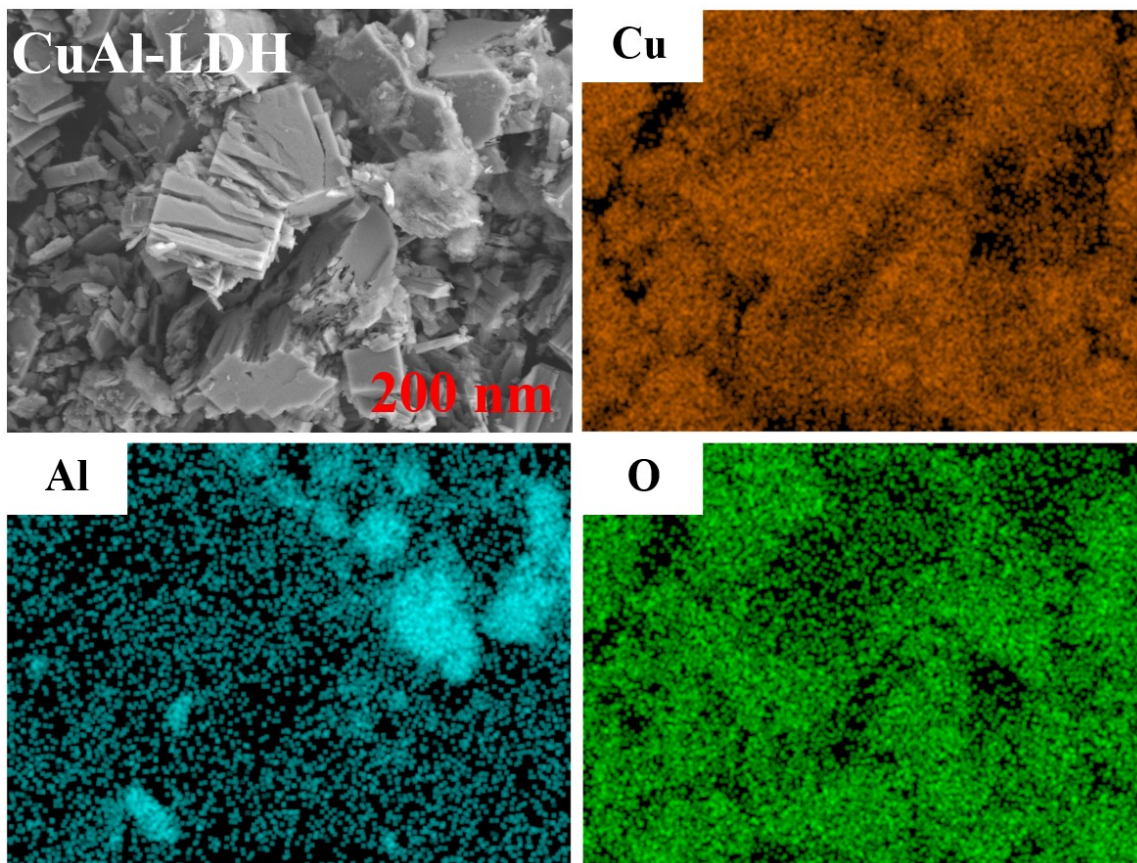

Figure S3. EDS image of CuAl-LDH.

42  
43  
44

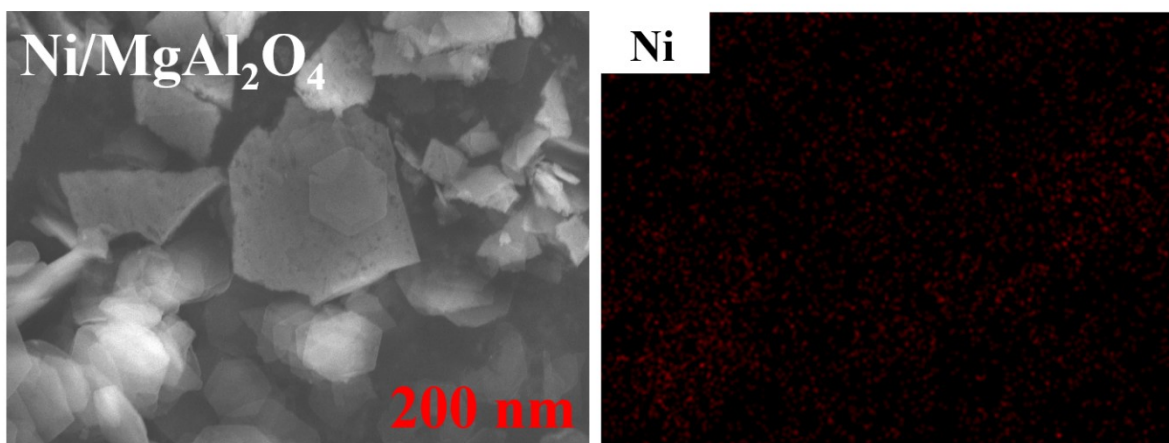

45  
46  
47

**Figure S4.** EDS image of Ni/MgAl<sub>2</sub>O<sub>4</sub>.

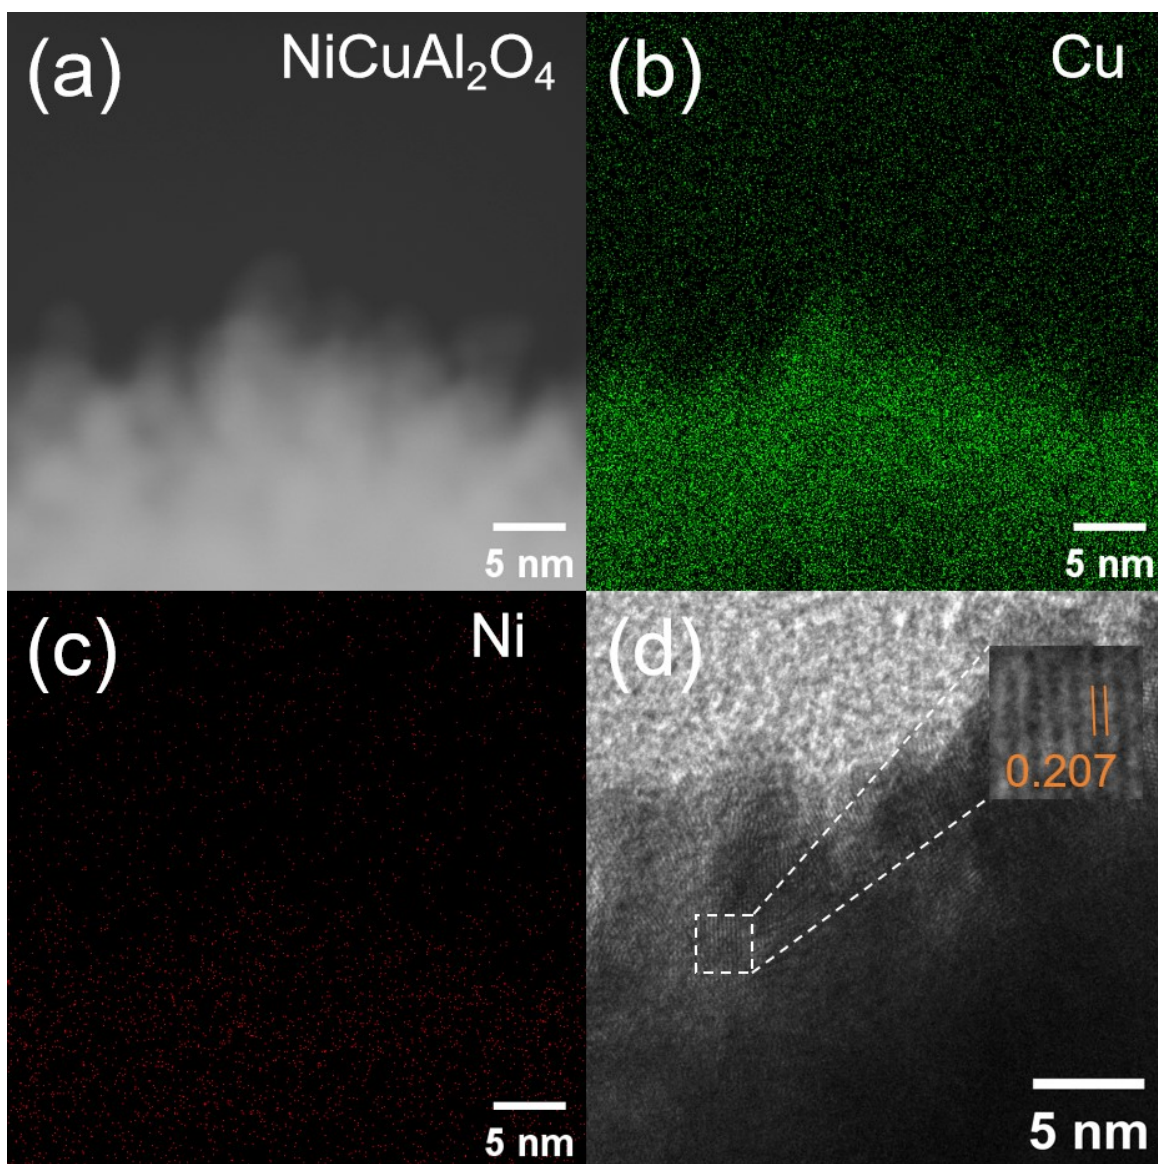

48

49 **Figure S5.** TEM characterization of the Ni/CuAl<sub>2</sub>O<sub>4</sub> catalyst: (a) structural morphology; (b) EDS

50 elemental mapping of Cu; (c) EDS elemental mapping of Ni; (d) lattice fringe spacing.

51

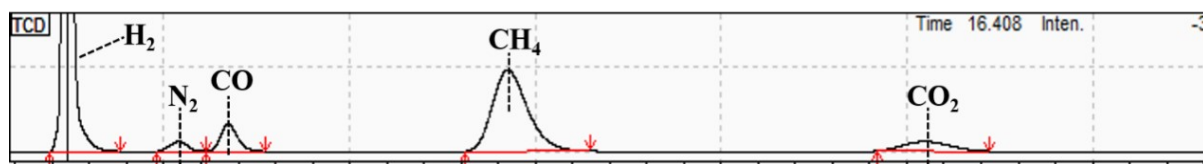

52

53

54

**Figure S6.** Gas chromatography sample diagram of the reaction product.

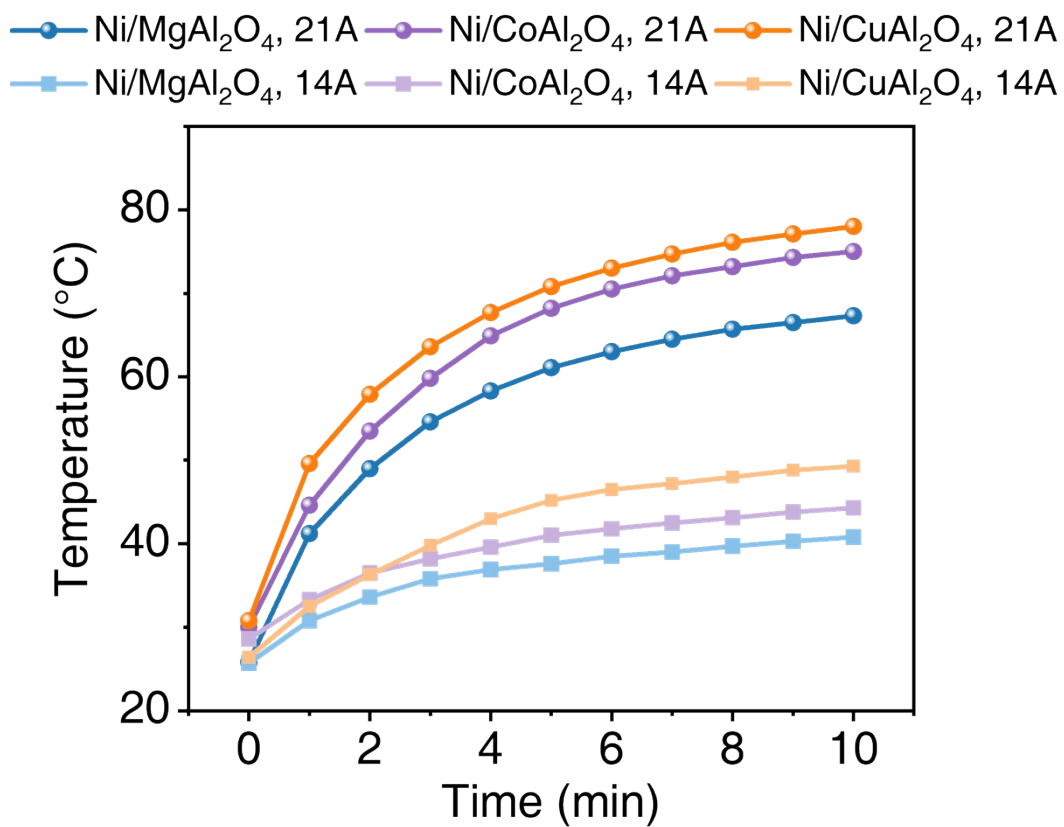

55

56 **Figure S7.** Effect of xenon lamp current on the temperature of Ni/MgAl<sub>2</sub>O<sub>4</sub>, Ni/CoAl<sub>2</sub>O<sub>4</sub>, and

57

Ni/CuAl<sub>2</sub>O<sub>4</sub> (Reaction conditions: 600 °C, GHSV = 12000 mL·g<sup>-1</sup>·h<sup>-1</sup>).

58

**Table S1.** Mass fraction of Ni in the catalyst.

| <b>Catalyst</b>                     | <b>Actual loading amount of Ni</b> |
|-------------------------------------|------------------------------------|
|                                     | <b>wt%</b>                         |
| Ni/MgAl <sub>2</sub> O <sub>4</sub> | 2.93                               |
| Ni/CoAl <sub>2</sub> O <sub>4</sub> | 2.94                               |
| Ni/CuAl <sub>2</sub> O <sub>4</sub> | 2.91                               |

61 **Table S2.** The specific surface area, pore volume, and average pore diameter of Ni/MgAl<sub>2</sub>O<sub>4</sub>,  
62 Ni/CoAl<sub>2</sub>O<sub>4</sub>, and Ni/CuAl<sub>2</sub>O<sub>4</sub>.

| Catalyst                            | Specific surface area              | Pore volume                         | Average pore diameter |
|-------------------------------------|------------------------------------|-------------------------------------|-----------------------|
|                                     | (m <sup>2</sup> ·g <sup>-1</sup> ) | (cm <sup>3</sup> ·g <sup>-1</sup> ) | (nm)                  |
| Ni/MgAl <sub>2</sub> O <sub>4</sub> | 181.29                             | 0.16                                | 13.37                 |
| Ni/CoAl <sub>2</sub> O <sub>4</sub> | 52.8                               | 0.22                                | 17.58                 |
| Ni/CuAl <sub>2</sub> O <sub>4</sub> | 44.81                              | 0.12                                | 7.45                  |

63

64 **Table S3.** Relative amounts of oxygen vacancies in Ni/MgAl<sub>2</sub>O<sub>4</sub>, Ni/CoAl<sub>2</sub>O<sub>4</sub>, and Ni/CuAl<sub>2</sub>O<sub>4</sub>  
65 calculated from XPS results.

| Catalyst                            | Oxygen vacancy content    |
|-------------------------------------|---------------------------|
|                                     | $O_V / (O_L + O_V + O_C)$ |
| Ni/MgAl <sub>2</sub> O <sub>4</sub> | 32.06%                    |
| Ni/CoAl <sub>2</sub> O <sub>4</sub> | 59.29%                    |
| Ni/CuAl <sub>2</sub> O <sub>4</sub> | 58.26%                    |

66

67 **Table S4.** Reaction rates of Ni/CuAl<sub>2</sub>O<sub>4</sub>, Ni/CoAl<sub>2</sub>O<sub>4</sub>, and Ni/MgAl<sub>2</sub>O<sub>4</sub> catalysts in the TC-  
68 DRM and PTSC-DRM reactions (Reaction conditions: 600 °C, the light intensity is 2.91 W·cm<sup>-2</sup>,  
69 GHSV = 12000 mL·g<sup>-1</sup>·h<sup>-1</sup>).

| Catalyst                            | Reaction rates (mL·g <sup>-1</sup> ·h <sup>-1</sup> ) |                    |                      |                    |
|-------------------------------------|-------------------------------------------------------|--------------------|----------------------|--------------------|
|                                     | PTSC-CH <sub>4</sub>                                  | TC-CH <sub>4</sub> | PTSC-CO <sub>2</sub> | TC-CO <sub>2</sub> |
| Ni/CuAl <sub>2</sub> O <sub>4</sub> | 1299.72                                               | 758.58             | 1587                 | 1122.25            |
| Ni/CoAl <sub>2</sub> O <sub>4</sub> | 5489.2                                                | 3878.58            | 5545.8               | 3962.58            |
| Ni/MgAl <sub>2</sub> O <sub>4</sub> | 4618.54                                               | 2438.58            | 5055.16              | 3027.78            |

70

71 **Table S5.** Selectivity of Ni/CuAl<sub>2</sub>O<sub>4</sub>, Ni/CoAl<sub>2</sub>O<sub>4</sub>, and Ni/MgAl<sub>2</sub>O<sub>4</sub> catalysts in TC/PTSC-DRM  
72 reactions (Reaction conditions: 600 °C, the light intensity is 2.91 W·cm<sup>-2</sup>, GHSV = 12000 mL·g<sup>-1</sup>·h<sup>-1</sup>).  
73

| Catalyst                            | H <sub>2</sub> /CO |      |
|-------------------------------------|--------------------|------|
|                                     | PTSC               | TC   |
| Ni/CuAl <sub>2</sub> O <sub>4</sub> | 0.77               | 0.62 |
| Ni/CoAl <sub>2</sub> O <sub>4</sub> | 0.99               | 0.97 |
| Ni/MgAl <sub>2</sub> O <sub>4</sub> | 0.96               | 0.87 |

74

75 **Table S6.** Carbon deposition of Ni/MgAl<sub>2</sub>O<sub>4</sub> and Ni/CoAl<sub>2</sub>O<sub>4</sub> after TC and PTSC reactions.

| Catalyst                                  | Reaction | Detection | Weight | Carbon deposit | Carbon deposition     |
|-------------------------------------------|----------|-----------|--------|----------------|-----------------------|
|                                           | time     | quality   | loss   | amount         | rate                  |
|                                           | (h)      | (mg)      | (%)    | (mg)           | (mg·h <sup>-1</sup> ) |
| Ni/MgAl <sub>2</sub> O <sub>4</sub> -PTSC | 68.25    | 4.864     | 68.41  | 3.33           | 0.049                 |
| Ni/MgAl <sub>2</sub> O <sub>4</sub> -TC   | 19.5     | 4.532     | 63.39  | 2.87           | 0.15                  |
| Ni/CoAl <sub>2</sub> O <sub>4</sub> -PTSC | 9.75     | 4.116     | 60.17  | 2.48           | 0.25                  |
| Ni/CoAl <sub>2</sub> O <sub>4</sub> -TC   | 6.5      | 4.837     | 67.2   | 3.25           | 0.5                   |

76
